# Supplementary material for: Epithelial wound healing in Clytia hemisphaerica provides insights into extracellular ATP signaling mechanisms and P2XR evolution
Source: Springer Nature journal article supplement (doi:10.1038/s41598-023-45424-5), 2023-11-01
Supplement: MOESM8 [file 41598_2023_45424_MOESM8_ESM.pdf › 41598_2023_45424_MOESM8_ESM.pdf]

## **Supplementary Figures**

### **Epithelial wound healing in *Clytia hemisphaerica* provides insights into extracellular ATP signaling mechanisms and P2XR evolution**

**Elizabeth EL Lee<sup>1</sup>, Isabel O'Malley-Krohn<sup>2</sup>, Eric Edsinger<sup>3</sup>, Stephanie Wu<sup>2</sup>, Jocelyn Malamy<sup>1#</sup>**

1. Department of Molecular Genetics and Cell Biology, The University of Chicago, 929 East 57<sup>th</sup> Street, Chicago, IL 60637

2. Biological Sciences Collegiate Division, The University of Chicago, 929 East 57<sup>th</sup> Street, Chicago, IL 60637

3. Whitney Laboratory for Marine Biosciences, University of Florida, 9505 N Ocean Shore Blvd, St. Augustine, FL 32080

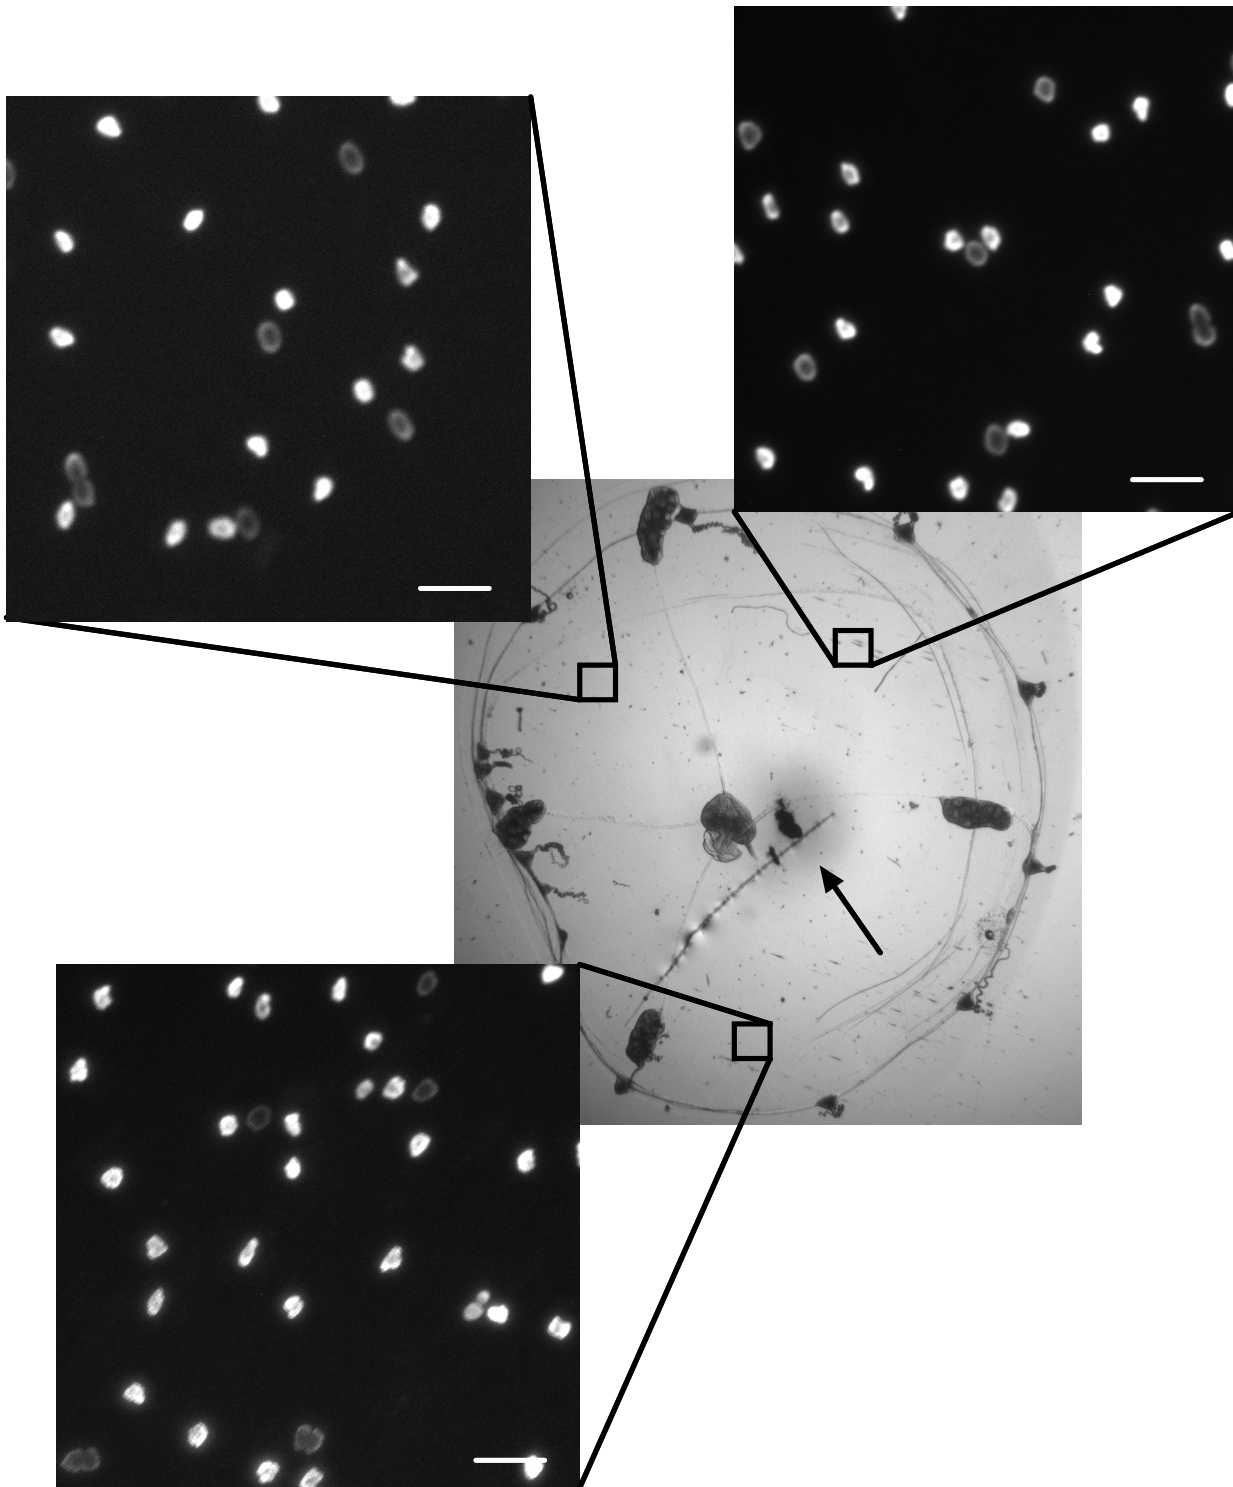

**Supplementary Figure S1. Hoechst dye diffuses from the site of injection to all four quadrants**

Adult medusa injected with 10  $\mu$ M Hoechst dye. Injection site is indicated by an arrow. Inserts are images of Hoechst-stained nuclei in three locations 5 minutes post-injection, indicating diffusion of the dye throughout the mesoglea and into the cells. Scale bars = 50  $\mu$ m.

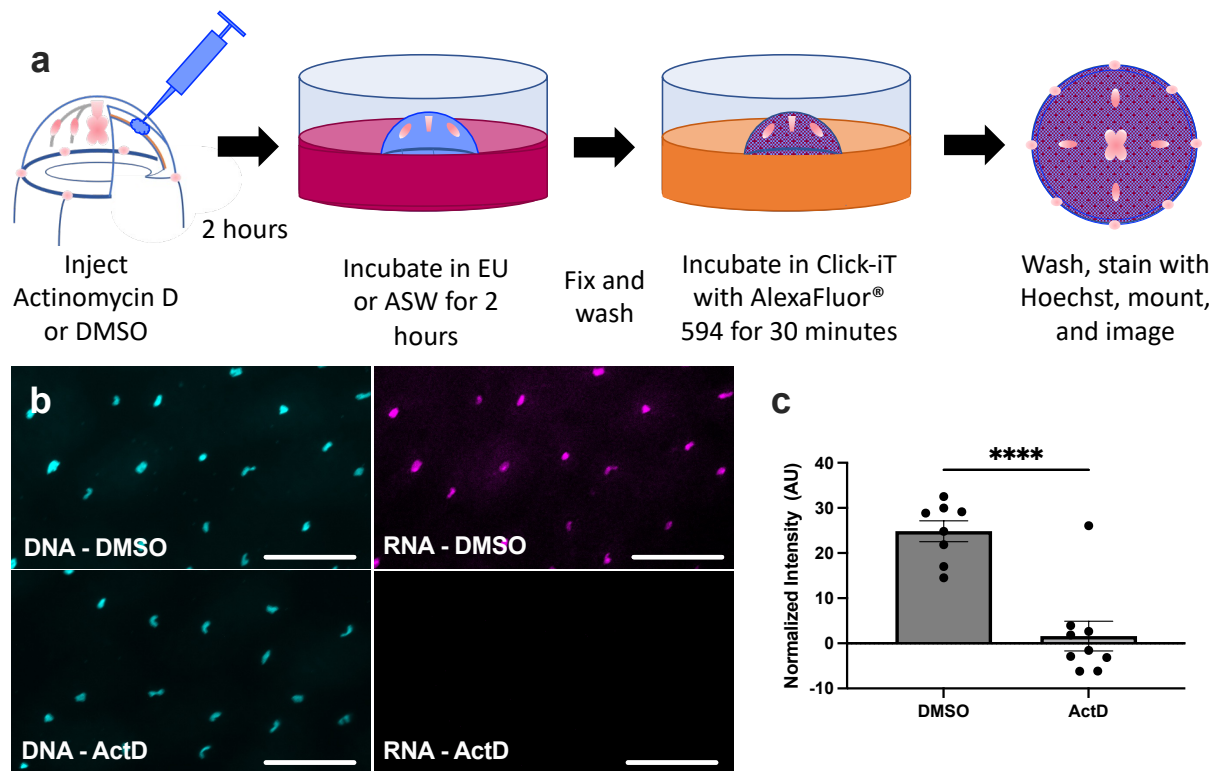

**Supplementary Figure S2. Actinomycin D inhibits *de novo* transcription in Clytia.**

**a)** Schematic representation of EU labeling of *de novo* transcription in the presence of actinomycin D (ActD) or DMSO. **b)** 80 mM ActD represses transcription in the exumbrella epithelial cells. Representative images of exumbrella epithelial cells show DNA (Hoechst (left)) or *de novo* transcripts (RNA, EU (right)). **c)** Quantification of *de novo* transcription in the presence or absence of 80 mM ActD. Each datapoint represents the mean fluorescence intensity of EU in Hoechst-labeled nuclei in a single animal; two images were collected per animal. DMSO: n = 8, ActD: n = 9. n = number of animals. Bars represent the mean of the datapoints  $\pm$ SEM. Unpaired two-tailed T-test: P-value <0.0001 (\*\*\*\*).

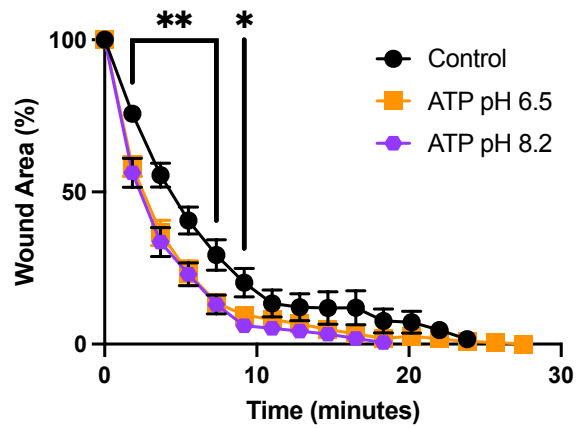

**Supplementary Figure S3. Reduced pH is not responsible for ATP's effect on wound healing rate.**

ASW (control) has a pH of 8.2, whereas unadjusted 1 mM ATP has a pH of 6.5. Adjusting 1 mM ATP to pH 8.2 does not alter its ability to increase the wound healing rate, indicating that weak acidity of the solution does not explain the observed effect. One-way analysis of variance (ANOVA) at each time point:  $P < 0.01$  (\*\*);  $P < 0.05$  (\*).  $n$  = number of wounds analyzed in independent animals. Data is presented as mean percent of original wound area  $\pm$  SEM.



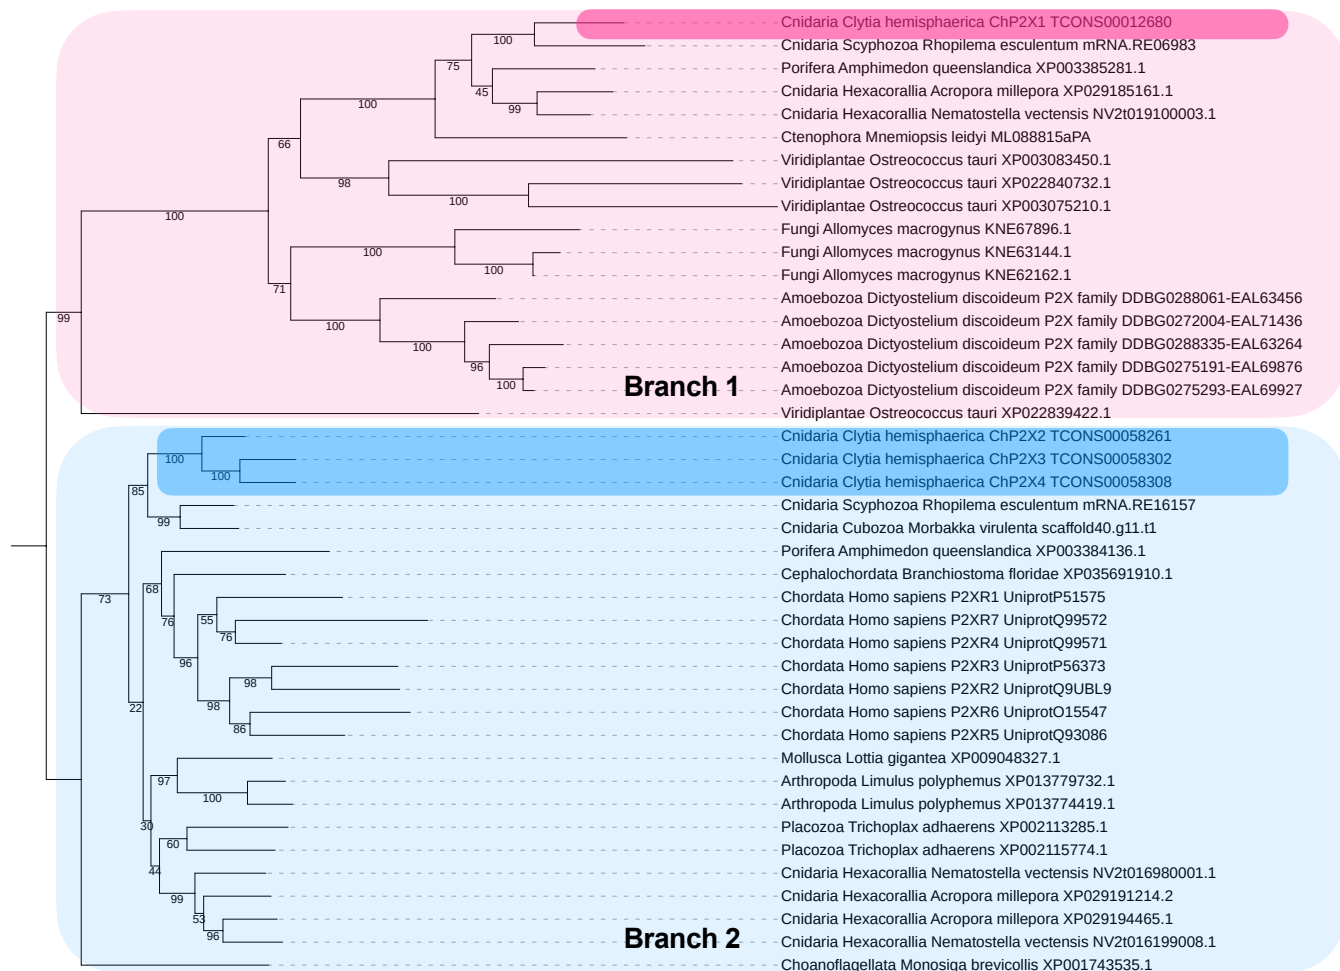

#### Supplementary Figure S4. Un-rooted un-collapsed phylogenetic tree of P2XRs across eukaryotes.

Homologs were detected by reciprocal BLAST back to reference gene family. Sequences were aligned in MAFFT, trimmed in ClipKit, and maximum likelihood trees produced in IQTree (see Methods). The tree is unrooted and no branches are collapsed. Branches having 95% or greater ultrafast bootstrap support are considered significant under ultrafast bootstrapping guidelines<sup>91</sup>. A rooted collapsed version of the tree is provided as Figure 7 in the main text.

## Conservation

Human P2X1 1 - - - - - MARRFQEELAAFLFEYDTGKPRMVLVRNKKKVGVIIFRLIQLVVLVYVIGWVFL 50  
Clytia\_00058302 1 LKMNQSRKQMVLEKSKFHCINFLLSYETGKVVVEIQNKKKVAFWYRRLIQLSVVIYVIGYAI 60  
Clytia\_00058261 1 - - - - - MGLTECRQKKGIGILLHNYETVKIIDIKNKKKVGALYFRFIQLI IISYVIGYVIV 51  
Clytia\_00058308 1 - - - - - MTGCAKVKNFYDFLFNFYQTVKLAIEIKDKKVGILSFRVFIQLAIVCYIIFVYV 52  
Clytia\_00012680 1 - - - - - - MSLFHYVTYKYYIIIKDKRRLGIALYIILAFLLIIFYITLVQTLV 40  
DICTYP2XE 1 - - - - - MNFRNIDWDSLSFSYSTIKIVIRIKDKRRLGILHFAFLIGIILYIIVGTIF 48  
DICTYP2XD 1 - - - - - MDWDNIFSYNTAKIVTIKDRRLGLHIIIFMVLIVYIIVYSTI 43  
DICTYP2XA 1 - - - - - MGFSFDWDDIFQYSTVKIVRIRDRRLGILHLSFSLVGIIVAYIVVYSAI 47  
DICTYP2XB 1 - - - - - MTIDWDSILSYNTIKVVIRIRDRRLGILHLCLFLIVLIVLYVVVYSAI 45

## Conservation

Human P2X1 51 YEKGYQTSSGLISSVSVKLGKGLAVTQLPG - - - - - L - - - - - GPQ 83  
Clytia\_00058302 61 YDKGYQEIDSAISSNTNTKKGKITHVNFNGN - - - - - FPFSTFFNGRM 99  
Clytia\_00058261 52 YKKGYQEFDAISTVTTKLKGITTYVDFGK - - - - - FNSTLFNGIR 90  
Clytia\_00058308 53 YKKGYQEFDAISTVTTKLKGITTYVDFGK - - - - - FNSSLFNGLQ 91  
Clytia\_00012680 41 NKSYLQYDSSPSGNMRLVNTPTKLQNDENEYININPDYCKQKESA - - - - - NST - - - - - ICR 91  
DICTYP2XE 49 LQKKYLVLESPIGSI RTSLMAPS VKPT - - - - - DLPYCLKNGTDTSYDGYPNK - - - - - PCQ 98  
DICTYP2XD 44 YKKGYLLTETPVGSI RASLLAPNEFKDDSD - - - - - NFKYCDDN - - - - - LIEYNTFKL - - - - - ECD 92  
DICTYP2XA 48 I KKGYLFTETPVGSI VRTSLKKGPNTFAS - - - - - NLTYCSNQHNQSYPFTPL - - - - - ECN 97  
DICTYP2XB 46 I KKGYVTTTEEPVGSIRTSLLAPDE LKS - - - - - NQAYCKNN - - - - - TEPYPYEKL - - - - - DCV 92

## Conservation

Human P2X1 84 VWDVADYVFP AQGDNSFVVMTNFIVTPKQTQGYCAE - - - - - HPEG - - - - - GICKEDSGCTPGKA 137  
Clytia\_00058302 100 IYDPQDYVIK - QDGDSEFFVMNTNMVITPKQYQGGKCE - - - - - DPESYRTICKTDKDCQQTGS 154  
Clytia\_00058261 91 IYDPNDYVIPPQETDAFVMTNMILTPKQYQSGNCE - - - - - DSKFKDIHCKKSDCCKMVP 146  
Clytia\_00058308 92 VYDAEDYVIKPKDGNLSFVMTNMVITPKQYQGGKCE - - - - - DPESYQALCKTDKDCQQTGS 147  
Clytia\_00012680 92 KLDGLSLNWPIESRVTLAT - FIKKEK - WQRPKDCQYALVYDPEN - - - - - PVKYE - - - - - 138  
DICTYP2XE 99 YWDEYSLVLYPPSEESSMFIITTRCTQETQSTVNGCNL - - - - - SEP - - - - - TCYVN - - - - - 142  
DICTYP2XD 93 YWDEAFVVSFFVGGDVSFAVTTTRVKTLL - - - - - DQVLCNCSS - - - - - KNP - - - - - KCKYT - - - - - 134  
DICTYP2XA 98 YWDEQLALFPVGGDVSFTCTTRVRLS - - - - - KQEANCF - - - - - TDP - - - - - TCKFY - - - - - 139  
DICTYP2XB 93 YWDEKLALFPVGGDVSFTASTRMRIS - - - - - DQTVNCSL - - - - - MNP - - - - - SCKFY - - - - - 134

## Conservation

Human P2X1 138 KRKAQGI RTGKCVAF - - - - - NDTVKTCEIFGWCPVEVD DDIPRP - - - - - ALLREAEANT 186  
Clytia\_00058302 155 NKYGHGERSGRCVPSDRNSTVKKVCESYGWCPTEYDV - - - - - LPMENYNNFSKTIPLLDGKTKEST 213  
Clytia\_00058261 147 VKNGNGVRTGKCVSSDRNSSMTVCEIYGWCPTEVDQ - - - - - LPMNP - - - - - SDTVPPLLDGKTKEST 204  
Clytia\_00058308 148 NKYGHGERTGRCVPSYRNSTLTVCIEIHGWCPTEDDR - - - - - LPMIK - - - - - SNVSTNIPLLLEGTKHAT 205  
Clytia\_00012680 139 - - - - - DL - - - - - - - - - - RDVDYAVNPEFAL 154  
DICTYP2XE 143 - - - - - TT - - - - - - - - - - SSDFYIANVENFT 158  
DICTYP2XD 135 - - - - - TV - - - - - - - - - - STRNVYVSDIEDFT 150  
DICTYP2XA 140 - - - - - DE - - - - - - - - - - PG - - - - - SAKNIYIADIESFT 157  
DICTYP2XB 135 - - - - - TN - - - - - - - - - - TSMNVYLADIESFT 150

## Conservation

Human P2X1 187 LFIKNSISFPRFKVNRNRLVEE - VNAAHMKTCFLHKT LHP - - - - - LCPVFQ 231  
Clytia\_00058302 214 VLIKNQIHFPKFKVTRNNIVHNQKKGSYMKRCLHNEETDP - - - - - FCPIFK 259  
Clytia\_00058261 205 MLVKNQISFPRFKFRAIRNNIIQF - NDSTYLKRCCHYNSDTP - - - - - LCPIFN 249  
Clytia\_00058308 206 VLIKNQIDFMKFDVATYNIPT - NNSRTYMKKCRYNAKTDP - - - - - LCPIFR 250  
Clytia\_00012680 155 IKVEHSFTAFSGQLT - - - - - NHSHRMSGSLVDMNGNTIKRL - - - - - NSNGVSKVDK - IL 202  
DICTYP2XE 159 ILLDHTLSAPSLGIQ - - - - - YNSAKQLNGQLLTDGNNPMSLPP - PNIVGVKGSPPDIMS 209  
DICTYP2XD 151 ILLDHTMFAPSSLIQ - - - - - YNSAKQLKGYILNDNNEIQINETINTVIGIPGKPDILT 202  
DICTYP2XA 158 ILLDHTMYAPSSSGSQ - - - - - FNAVDLHGYILNDQDGEVQIDANGSTIGVSGKPDIMT 209  
DICTYP2XB 151 VLI DHTMYAPSSSQIQ - - - - - FNGDDLSGYVLDQNGNEIQLNESVNTIGVQGKPDILQ 202

## Conservation

Human P2X1 232 LGYVVQES - - - - - GQNFSTLAEKGGVVGITIDWHCD - - - - - LDWHVVRHCRPIYEFH 277  
Clytia\_00058302 260 LRNI VENC - - - - - GDNYTKVGFKGGIYGI I IKWDCN - - - - - LDHSIYDCVPEYKFE 305  
Clytia\_00058261 250 LNDIVSSC - - - - - GDNYTDVAYQGA IYGI I IEWDCN - - - - - LDHSIDELCPKYQFK 295  
Clytia\_00058308 251 LQDIVSSC - - - - - GDNYTQVAFKGA IYGI I IEWKCN - - - - - LDYSIEECLPKYRFK 296  
Clytia\_00012680 203 LKDFLIAANV - SLDEVS DALNAKERTFRQNGLILHVSIMYKNSEKMLYGVNIPEYTYHVR 261  
DICTYP2XE 210 LQGVLLTAAGVESLDSQ - - - - - GLANKSRTIRDDGLILLCFITYSNT - - - - - TYNTNGNYHYTYQFK 265  
DICTYP2XD 203 IGKLLQLLANI - DLDGA - - - - - SSVNSTSVRYDGVVVALVFITYSNT - - - - - FSYNTNFKYVYSIQ 257  
DICTYP2XA 210 IGQLLSFGGV - SLDQA - - - - - SPVDSNVSIRYDGVVLFVFIYTSNT - - - - - TYYSTSDFKYVYSVQ 264  
DICTYP2XB 203 LGKLLLEFAGV - DLDGP - - - - - SLVNSNSIRYDGCVLFFVFIYTSNT - - - - - FSYDLKKIKYVYSIK 257

## Conservation

Human P2X1 278 GLYEE - KNLSPGFNFR FARHFV - - - - - ENGTNYRHLLFKVFGIRFDILVDGKAGKFDIIPTM 332  
Clytia\_00058302 306 RLDDDEKTPLSHGYNFRYVNYFV - - - - - ENGTTRYRTLTKAYGIFKFLVHGEAGKFSFIPLM 361  
Clytia\_00058261 296 RLDDVNSPISPGYNFYADYV - - - - - EEDTRYRTLTKAYGIFKFLVHGEAGKFNVIPL 351  
Clytia\_00058308 297 RLDSNRSSISKGFNFRYVNYV - - - - - EKGKRYRTLTKAYGIFKFLVHGEAGKFNVIPL 352  
Clytia\_00012680 262 RVPFSD - - - - - YRLKQEIPIANNEGNICERIKKRYAVRIEFHQGGKIGQFSSANLV 313  
DICTYP2XE 266 LVQNTK - - - - - YKIVKEPVF - - - - - TKDVEDRYIFDRHGVRIIFIQTGQLGQFSSQTM 313  
DICTYP2XD 268 KVEDTE - - - - - YGVEAVI - - - - - LDNVSSRMYYNRRHGIRLIFIQNGEIGSFNFQALL 305  
DICTYP2XA 265 QIANT I - - - - - YDVPETII - - - - - LESIHSLLYYRHGIRLIFIQTGTIGSFHFQTL 312  
DICTYP2XB 258 KVDDTA - - - - - YDVEPII - - - - - LNNENSRLLYKRRHAIIRLIFIQTGVIGSFNFQSL 305

## Conservation

Human P2X1 333 TTIGSGIGIFGVATVLCDDL LLLHILPKRHY YKQKKFKESAEDMGPP - - - - - GAAERDLAATS 387  
Clytia\_00058302 362 LNLGAGIGLLGLIATVWCDFIVLNLAKKRNVYRNHICESVGRGMSSNEKSSLDGDTK - - - - - 417  
Clytia\_00058261 352 TNLGAGMALLG IATVWCDFIVMYL LKKRNVYREHYQQRVDDDSQDPKGNVQVDDDENE - - - - - 409  
Clytia\_00058308 353 TNLGAGIGLLGLLATLCCDFIVLNLVPRKRNVYRDYICADVTQEEYEHLREAAKKEEKEATR 412  
Clytia\_00012680 314 FQLVSVMGLLTLTATVIDVIALYIVPNKDNVYRQYVFDESPEFSEQEKQTLKENVNDDEQ - S 372  
DICTYP2XE 314 LTFVSGIGLVTAASLIVDI IATIRMPQRSRYQELKFQDSSINN - - - - - TQKTPTNDHTP - L 368  
DICTYP2XD 306 LTFVSGGLGLLAISTVLVDQLAIRFLPERKTYSSHKFQIDTHGFSERAKLRISQNEKDP - L 364  
DICTYP2XA 313 LTLVSGGLGLLAVATTVDQLAIRLLPQRKSYSSSLKFQVTESSMSNPMKKRITTTDEGEDV - L 371  
DICTYP2XB 306 LTLVSGGLGLLTVSTLIVDQLAIRFLPQRKSYSSSLKFQTTESF - - - - - RMKKKIVNDDGEDK - L 362

## Conservation

Human P2X1 388 ST - - - LGLQENMR - - - TS - - - - - 399  
Clytia\_00058302 418 - - - - - QNCD - - - EKKTQEN - - - - - 429  
Clytia\_00058261 410 LE - - - - - SDRPEAER - L IKP - - - - - 423  
Clytia\_00058308 413 LK - - - LMMVNKCA - - - VRSPHTARKLLEML - - - - - 436  
Clytia\_00012680 373 KKDQ - - - - - - - - - - 376  
DICTYP2XE 369 LKDNEDTINENSYQNNSEYK - - - - - 388  
DICTYP2XD 365 LLEVETKNNENNNDYNDDDNEIFDDNNNGYQNIQNNNIIL 407  
DICTYP2XA 372 YT - RIEGL - - - - - 378  
DICTYP2XB 363 YH - NIEAL - - - - - 369

**Supplementary Figure S5. Alignment of Clytia and Dictyostelium P2XR homologs with human P2XR.**

Sequences were aligned using Clustal omega (<https://www.ebi.ac.uk/Tools/msa/clustalo/>)<sup>S1</sup>. Red boxes indicate residues similar or identical across the tree of life as identified by Surprenant and North<sup>66</sup>. Similar are IVLM, FYWH, KRH, EQDN. Yellow highlighting indicates amino acids shown to be essential for ATP binding in vertebrates. Blue boxes identify critical amino acids for PPADS sensitivity in vertebrates. Note that ChP2X1 does not have the critical amino acids for PPADS sensitivity.

## Supplementary Table S1 – Metazoan species genomes evaluated for completeness.

Original list of species whose genomes were evaluated for completeness.

| Genus species                     | Name                                | Phylo-name                                                                               |
|-----------------------------------|-------------------------------------|------------------------------------------------------------------------------------------|
| <i>Acanthopleura granulata</i>    | Chiton                              | Metazoa-Mollusca-Polyplacophora-Chitonida-Chitonidae-Acanthopleura-granulata             |
| <i>Achatina fulica</i>            | Giant African snail                 | Metazoa-Mollusca-Class_unresolved-Order_unresolved-Family_unresolved-Achatina-fulica     |
| <i>Acropora millepora</i>         | Stony coral                         | Metazoa-Cnidaria-Anthozoa-Scleractinia-Acroporidae-Acropora-millepora                    |
| <i>Adineta ricciae</i>            | Rotifer                             | Metazoa-Rotifera-Eurotatoria-Adinetida-Adinetidae-Adineta-ricciae                        |
| <i>Ailuropoda melanoleuca</i>     | Panda                               | Metazoa-Chordata-Mammalia-Carnivora-Ursidae-Ailuropoda-melanoleuca                       |
| <i>Alligator mississippiensis</i> | Alligator                           | Metazoa-Chordata-Class_unclassified-Crocodylia-Alligatoridae-Alligator-mississippiensis  |
| <i>Amblyraja radiata</i>          | Thorny skate                        | Metazoa-Chordata-Chondrichthyes-Rajiformes-Rajidae-Amblyraja-radiata                     |
| <i>Amia calva</i>                 | Bowfin fish                         | Metazoa-Chordata-Actinopteri-Amiiformes-Amiidae-Amia-calva                               |
| <i>Amphibalanus amphitrite</i>    | Barnacle                            | Metazoa-Arthropoda-Hexanauplia-Sessilia-Balanidae-Amphibalanus-amphitrite                |
| <i>Amphimedon queenslandica</i>   | Marine sponge                       | Metazoa-Porifera-Demospongiae-Haplosclerida-Niphatidae-Amphimedon-queenslandica          |
| <i>Amyelois transitella</i>       | Navel orangeworm moth               | Metazoa-Arthropoda-Insecta-Lepidoptera-Pyralidae-Amyelois-transitella                    |
| <i>Amyntas corticis</i>           | Earthworm                           | Metazoa-Annelida-Clitellata-Crassiclitellata-Megascolecidae-Amyntas-corticis             |
| <i>Anneissia japonica</i>         | Crionoid                            | Metazoa-Echinodermata-Crinoidea-Comatulida-Comatulidae-Anneissia-japonica                |
| <i>Anopheles gambiae</i>          | Mosquito                            | Metazoa-Arthropoda-Insecta-Diptera-Culicidae-Anopheles-gambiae                           |
| <i>Aphelenchus avenae</i>         | Aphelenchus nematode Free           | Metazoa-Nematoda-Chromadorea-Rhabditida-Aphelenchidae-Aphelenchus-avenae                 |
| <i>Apis mellifera</i>             | Western honey bee                   | Metazoa-Arthropoda-Insecta-Hymenoptera-Apidae-Apis-mellifera                             |
| <i>Apolygus lucorum</i>           | True bug                            | Metazoa-Arthropoda-Insecta-Hemiptera-Miridae-Apolygus-lucorum                            |
| <i>Apostichopus japonicus</i>     | Japanese spiky sea cucumber         | Metazoa-Echinodermata-Holothuroidea-Aspidochirotida-Stichopodidae-Apostichopus-japonicus |
| <i>Aptenodytes patagonicus</i>    | King Penguin                        | Metazoa-Chordata-Aves-Sphenisciformes-Spheniscidae-Aptenodytes-patagonicus               |
| <i>Archivesica marissinica</i>    | Deep sea clam                       | Metazoa-Mollusca-Bivalvia-Venerida-Vesicomysidae-Archivesica-marissinica                 |
| <i>Argiope bruennichi</i>         | Wasp spider                         | Metazoa-Arthropoda-Arachnida-Araneae-Araneidae-Argiope-bruennichi                        |
| <i>Aricia agestis</i>             | Brown argus butterfly               | Metazoa-Arthropoda-Insecta-Lepidoptera-Lycaenidae-Aricia-agestis                         |
| <i>Artemia franciscana</i>        | Brine shrimp                        | Metazoa-Arthropoda-Branchiopoda-Anostraca-Artemiidae-Artemia-franciscana                 |
| <i>Artibeus jamaicensis</i>       | Jamaican fruit bat                  | Metazoa-Chordata-Mammalia-Chiroptera-Phyllostomidae-Artibeus-jamaicensis                 |
| <i>Arvicola amphibius</i>         | European water vole                 | Metazoa-Chordata-Mammalia-Rodentia-Cricetidae-Arvicola-amphibius                         |
| <i>Asterias rubens</i>            | Common starfish                     | Metazoa-Echinodermata-Asteroidea-Forcipulatida-Asteriidae-Asterias-rubens                |
| <i>Astyanax mexicanus</i>         | Mexican tetra blind cavefish cave   | Metazoa-Chordata-Actinopteri-Characiformes-Characidae-Astyanax-mexicanus                 |
| <i>Austrofundulus limnaeus</i>    | Thickset riviulus killifish Guppies | Metazoa-Chordata-Actinopteri-Cyprinodontiformes-Rivulidae-Austrofundulus-limnaeus        |

|                                            |                            |                                                                                                                  |
|--------------------------------------------|----------------------------|------------------------------------------------------------------------------------------------------------------|
| <i>Bagarius yarrelli</i>                   | Goonch catfish             | Metazoa-Chordata-Actinopteri-Siluriformes-Sisoridae-Bagarius-yarrelli                                            |
| <i>Balaenoptera acutorostrata scammoni</i> | Minke whale                | Metazoa-Chordata-Mammalia-Artiodactyla-Balaenopteridae-Balaenoptera-acutorostrata_scammoni                       |
| <i>Balaenoptera musculus</i>               | Blue whale                 | Metazoa-Chordata-Mammalia-Artiodactyla-Balaenopteridae-Balaenoptera-musculus                                     |
| <i>Balaenoptera physalus</i>               | Fin whale                  | Metazoa-Chordata-Mammalia-Artiodactyla-Balaenopteridae-Balaenoptera-physalus                                     |
| <i>Bathymodiolus platifrons</i>            | Deep sea mussel            | Metazoa-Mollusca-Class_unresolved-Order_unresolved-Family_unresolved-Bathymodiolus-platifrons                    |
| <i>Batillaria attramentaria</i>            | Japanese mud snail         | Metazoa-Mollusca-Gastropoda-Order_unclassified-Batillariidae-Batillaria-attramentaria                            |
| <i>Belgica antarctica</i>                  | Antarctic midge            | Metazoa-Arthropoda-Insecta-Diptera-Chironomidae-Belgica-antarctica                                               |
| <i>Biomphalaria glabrata</i>               | Ram's horn snail           | Metazoa-Mollusca-Gastropoda-Order_unclassified-Planorbidae-Biomphalaria-glabrata                                 |
| <i>Blattella germanica</i>                 | German Cockroach           | Metazoa-Arthropoda-Insecta-Blattodea-Ectobiidae-Blattella-germanica                                              |
| <i>Boleophthalmus pectinirostris</i>       | Mudskipper Gobies          | Metazoa-Chordata-Actinopteri-Gobiiformes-Gobiidae-Boleophthalmus-pectinirostris                                  |
| <i>Bombyx mori</i>                         | Domestic silk moth         | Metazoa-Arthropoda-Insecta-Lepidoptera-Bombycidae-Bombyx-mori                                                    |
| <i>Bos taurus</i>                          | Cow                        | Metazoa-Chordata-Mammalia-Artiodactyla-Bovidae-Bos-taurus                                                        |
| <i>Branchiostoma floridae</i>              | Amphioxus                  | Metazoa-Chordata-Leptocardii-Amphioxiformes-Branchiostomidae-Branchiostoma-floridae                              |
| <i>Brugia malayi</i>                       | Genetic model nematode III | Metazoa-Nematoda-Chromadorea-Rhabditida-Onchocercidae-Brugia-malayi                                              |
| <i>Bufo gargarizans</i>                    | Asiatic toad               | Metazoa-Chordata-Amphibia-Anura-Bufonidae-Bufo-gargarizans                                                       |
| <i>Bugula neritina</i>                     | Brown bryozoan             | Metazoa-Bryozoa-Gymnolaemata-Cheilostomatida-Bugulidae-Bugula-neritina                                           |
| <i>Caenorhabditis elegans</i>              | Genetic model nematode V   | Metazoa-Nematoda-Chromadorea-Rhabditida-Rhabditidae-Caenorhabditis-elegans                                       |
| <i>Caligus rogercresseyi</i>               | Sea louse copepod          | Metazoa-Arthropoda-Hexanauplia-Siphonostomatoida-Caligidae-Caligus-rogercresseyi                                 |
| <i>Callorhinchus milii</i>                 | Australian ghost shark     | Metazoa-Chordata-Chondrichthyes-Chimaeriformes-Callorhinchidae-Callorhinchus-milii                               |
| <i>Camelus dromedarius</i>                 | Camel                      | Metazoa-Chordata-Mammalia-Artiodactyla-Camelidae-Camelus-dromedarius                                             |
| <i>Candidula unifasciata</i>               | Terrestrial snail          | Metazoa-Mollusca-Gastropoda-Stylommatophora-Geomitridae-Candidula-unifasciata                                    |
| <i>Canis lupus familiaris</i>              | Dog                        | Metazoa-Chordata-Mammalia-Carnivora-Canidae-Canis-lupus_familiaris                                               |
| <i>Capitella teleta</i>                    | Marine worm                | Metazoa-Annelida-Polychaeta-Order_unclassified-Capitellidae-Capitella-teleta                                     |
| <i>Capra hircus</i>                        | Goat                       | Metazoa-Chordata-Mammalia-Artiodactyla-Bovidae-Capra-hircus                                                      |
| <i>Capsaspora owczarzaki</i>               | Unicell                    | Kingdom_unclassified-Phylum_unclassified-Filasterea-Order_unclassified-Family_unclassified-Capsaspora-owczarzaki |
| <i>Carassius auratus</i>                   | Goldfish                   | Metazoa-Chordata-Actinopteri-Cypriniformes-Cyprinidae-Carassius-auratus                                          |
| <i>Carcharodon carcharias</i>              | Great white shark          | Metazoa-Chordata-Chondrichthyes-Lamniformes-Alopiidae-Carcharodon-carcharias                                     |
| <i>Carlito syrichta</i>                    | Philippine tarsier         | Metazoa-Chordata-Mammalia-Primates-Tarsiidae-Carlito-syrichta                                                    |
| <i>Cavia aperea</i>                        | Brazilian guinea pig       | Metazoa-Chordata-Mammalia-Rodentia-Caviidae-Cavia-aperea                                                         |
| <i>Chiloscyllium plagiosum</i>             | White spotted bamboo shark | Metazoa-Chordata-Chondrichthyes-Orectolobiformes-Hemiscylliidae-Chiloscyllium-plagiosum                          |

|                                  |                                   |                                                                                       |
|----------------------------------|-----------------------------------|---------------------------------------------------------------------------------------|
| <i>Chinchilla lanigera</i>       | Long-tailed chinchilla            | Metazoa-Chordata-Mammalia-Rodentia-Chinchillidae-Chinchilla-lanigera                  |
| <i>Choloepus didactylus</i>      | Xenarthra southern two-toed sloth | Metazoa-Chordata-Mammalia-Pilosa-Megalonychidae-Choloepus-didactylus                  |
| <i>Chrysemys picta</i>           | Painted turtle                    | Metazoa-Chordata-Class_unclassified-Testudines-Emydidae-Chrysemys-picta               |
| <i>Chrysochloris asiatica</i>    | Cape golden mole                  | Metazoa-Chordata-Mammalia-Afrosoricida-Chrysochloridae-Chrysochloris-asiatica         |
| <i>Chrysomallon squamiferum</i>  | Sea pangolin                      | Metazoa-Mollusca-Gastropoda-Order_unclassified-Peltosporidae-Chrysomallon-squamiferum |
| <i>Chrysoperla carnea</i>        | Green lacewing                    | Metazoa-Arthropoda-Insecta-Neuroptera-Chrysopidae-Chrysoperla-carnea                  |
| <i>Ciona intestinalis</i>        | Vase tunicate                     | Metazoa-Chordata-Ascidiacea-Phlebobranchia-Cionidae-Ciona-intestinalis                |
| <i>Clarias magur</i>             | Walking catfish                   | Metazoa-Chordata-Actinopteri-Siluriformes-Clariidae-Clarias-magur                     |
| <i>Cloeon dipterum</i>           | Mayfly                            | Metazoa-Arthropoda-Insecta-Ephemeroptera-Baetidae-Cloeon-dipterum                     |
| <i>Clonorchis sinensis</i>       | Chinese liver fluke               | Metazoa-Platyhelminthes-Trematoda-Opisthorchiida-Opisthorchiidae-Clonorchis-sinensis  |
| <i>Clytia hemisphaerica</i>      | Brady's hydrozoan                 | Metazoa-Cnidaria-Hydrozoa-Leptothecata-Clytiidae-Clytia-hemisphaerica                 |
| <i>Coccinella septempunctata</i> | Seven-spotted ladybird            | Metazoa-Arthropoda-Insecta-Coleoptera-Coccinellidae-Coccinella-septempunctata         |
| <i>Colossoma macropomum</i>      | Black pacu                        | Metazoa-Chordata-Actinopteri-Characiformes-Serrasalminidae-Colossoma-macropomum       |
| <i>Condylura cristata</i>        | Star-nosed mole                   | Metazoa-Chordata-Mammalia-Eulipotyphla-Talpidae-Condylura-cristata                    |
| <i>Conus betulinus</i>           | Cone snail                        | Metazoa-Mollusca-Gastropoda-Neogastropoda-Conidae-Conus-betulinus                     |
| <i>Coptotermes formosanus</i>    | Formosan subterranean termite     | Metazoa-Arthropoda-Insecta-Blattodea-Rhinotermitidae-Coptotermes-formosanus           |
| <i>Coregonus clupeaformis</i>    | Lake whitefish                    | Metazoa-Chordata-Actinopteri-Salmoniformes-Salmonidae-Coregonus-clupeaformis          |
| <i>Corvus moneduloides</i>       | New caledonian crow               | Metazoa-Chordata-Aves-Passeriformes-Corvidae-Corvus-moneduloides                      |
| <i>Crassostrea ariakensis</i>    | Suminoe oyster                    | Metazoa-Mollusca-Bivalvia-Ostreida-Ostreidae-Crassostrea-ariakensis                   |
| <i>Crassostrea gigas</i>         | Pacific oyster                    | Metazoa-Mollusca-Bivalvia-Ostreida-Ostreidae-Crassostrea-gigas                        |
| <i>Crassostrea virginica</i>     | Atlantic oyster                   | Metazoa-Mollusca-Bivalvia-Ostreida-Ostreidae-Crassostrea-virginica                    |
| <i>Crocodylus porosus</i>        | Australian saltwater crocodile    | Metazoa-Chordata-Class_unclassified-Crocodylia-Crocodylidae-Crocodylus-porosus        |
| <i>Crocuta crocuta</i>           | Spotted hyena                     | Metazoa-Chordata-Mammalia-Carnivora-Hyaenidae-Crocuta-crocuta                         |
| <i>Cryptotermes secundus</i>     | Termite                           | Metazoa-Arthropoda-Insecta-Blattodea-Kalotermitidae-Cryptotermes-secundus             |
| <i>Ctenocephalides felis</i>     | Cat fleas                         | Metazoa-Arthropoda-Insecta-Siphonaptera-Pulicidae-Ctenocephalides-felis               |
| <i>Cyclina sinensis</i>          | Black clam                        | Metazoa-Mollusca-Bivalvia-Venerida-Veneridae-Cyclina-sinensis                         |
| <i>Cyclopterus lumpus</i>        | Lumpsucker                        | Metazoa-Chordata-Actinopteri-Perciformes-Cyclopteridae-Cyclopterus-lumpus             |
| <i>Cyprinus carpio</i>           | Common carp                       | Metazoa-Chordata-Actinopteri-Cypriniformes-Cyprinidae-Cyprinus-carpio                 |
| <i>Danaus plexippus</i>          | Monarch butterfly                 | Metazoa-Arthropoda-Insecta-Lepidoptera-Nymphalidae-Danaus-plexippus                   |
| <i>Danio rerio</i>               | Zebrafish                         | Metazoa-Chordata-Actinopteri-Cypriniformes-Danionidae-Danio-rerio                     |

|                                    |                                 |                                                                                      |
|------------------------------------|---------------------------------|--------------------------------------------------------------------------------------|
| <i>Daphnia magna</i>               | Waterflea                       | Metazoa-Arthropoda-Branchiopoda-Diplostraca-Daphniidae-Daphnia-magna                 |
| <i>Dasypus novemcinctus</i>        | Xenarthra nine-banded armadillo | Metazoa-Chordata-Mammalia-Cingulata-Dasyopodidae-Dasypus-novemcinctus                |
| <i>Delphinapterus leucas</i>       | Beluga whale                    | Metazoa-Chordata-Mammalia-Artiodactyla-Monodontidae-Delphinapterus-leucas            |
| <i>Dicyema japonicum</i>           | Dicyemid                        | Metazoa-Dicyemida-Class_unclassified-Order_unclassified-Dicyemidae-Dicyema-japonicum |
| <i>Dimorphilus gyrociliatus</i>    | Polychaete worm                 | Metazoa-Annelida-Polychaeta-Order_unclassified-Dinophilidae-Dimorphilus-gyrociliatus |
| <i>Diploscapter coronatus</i>      | Nematode V                      | Metazoa-Nematoda-Chromadorea-Rhabditida-Rhabditidae-Diploscapter-coronatus           |
| <i>Ditylenchus destructor</i>      | Nematode IV                     | Metazoa-Nematoda-Chromadorea-Rhabditida-Anguinidae-Ditylenchus-destructor            |
| <i>Ditylenchus dipsaci</i>         | Nematode IV                     | Metazoa-Nematoda-Chromadorea-Rhabditida-Anguinidae-Ditylenchus-dipsaci               |
| <i>Dreissena polymorpha</i>        | Zebra mussel                    | Metazoa-Mollusca-Bivalvia-Myida-Dreissenidae-Dreissena-polymorpha                    |
| <i>Dreissena rostriformis</i>      | Quagga mussel Dres              | Metazoa-Mollusca-Bivalvia-Myida-Dreissenidae-Dreissena-rostriformis                  |
| <i>Dromiciops gliroides</i>        | Marsupial Monito del monte      | Metazoa-Chordata-Mammalia-Microbiotheria-Microbiotheriidae-Dromiciops-gliroides      |
| <i>Drosophila melanogaster</i>     | Fruit fly                       | Metazoa-Arthropoda-Insecta-Diptera-Drosophilidae-Drosophila-melanogaster             |
| <i>Echinococcus multilocularis</i> | Tapeworm                        | Metazoa-Platyhelminthes-Cestoda-Cyclophyllidea-Taeniidae-Echinococcus-multilocularis |
| <i>Echinops telfairi</i>           | Small Madagascar hedgehog       | Metazoa-Chordata-Mammalia-Afrosoricida-Tenrecidae-Echinops-telfairi                  |
| <i>Eisenia andrei</i>              | Tiger worm relative             | Metazoa-Annelida-Clitellata-Crassiclitellata-Lumbricidae-Eisenia-andrei              |
| <i>Electrophorus electricus</i>    | Electric eel                    | Metazoa-Chordata-Actinopteri-Gymnotiformes-Gymnotidae-Electrophorus-electricus       |
| <i>Elephantulus edwardii</i>       | Cape elephant shrew             | Metazoa-Chordata-Mammalia-Macroselidea-Macroselidea-Elephantulus-edwardii            |
| <i>Elysia chlorotica</i>           | Sea slug photosynthesis         | Metazoa-Mollusca-Gastropoda-Order_unclassified-Plakobranhidae-Elysia-chlorotica      |
| <i>Elysia marginata</i>            | Sea slug photosynthesis         | Metazoa-Mollusca-Gastropoda-Order_unclassified-Plakobranhidae-Elysia-marginata       |
| <i>Ephemera danica</i>             | Mayfly                          | Metazoa-Arthropoda-Insecta-Ephemeroptera-Ephemeridae-Ephemera-danica                 |
| <i>Ephydatia muelleri</i>          | Sea2Water sponge                | Metazoa-Porifera-Demospongiae-Spongillida-Spongillidae-Ephydatia-muelleri            |
| <i>Eptatretus burgeri</i>          | Inshore hagfish                 | Metazoa-Chordata-Myxini-Myxiniformes-Myxinidae-Eptatretus-burgeri                    |
| <i>Equus caballus</i>              | Horse                           | Metazoa-Chordata-Mammalia-Perissodactyla-Equidae-Equus-caballus                      |
| <i>Erinaceus europaeus</i>         | Western european hedgehog       | Metazoa-Chordata-Mammalia-Eulipotyphla-Erinaceidae-Erinaceus-europaeus               |
| <i>Eulimnadia texana</i>           | Desert shrimp                   | Metazoa-Arthropoda-Branchiopoda-Diplostraca-Limnadiidae-Eulimnadia-texana            |
| <i>Eurytemora affinis</i>          | Copepod                         | Metazoa-Arthropoda-Hexanauplia-Calanoida-Temoridae-Eurytemora-affinis                |
| <i>Felis catus</i>                 | Cat                             | Metazoa-Chordata-Mammalia-Carnivora-Felidae-Felis-catus                              |
| <i>Folsomia candida</i>            | Springtail                      | Metazoa-Arthropoda-Collembola-Entomobryomorpha-Isotomidae-Folsomia-candida           |
| <i>Frankliniella occidentalis</i>  | Western flower thrips           | Metazoa-Arthropoda-Insecta-Thysanoptera-Thripidae-Frankliniella-occidentalis         |
| <i>Fukomys damarensis</i>          | Damara mole rat                 | Metazoa-Chordata-Mammalia-Rodentia-Bathyergidae-Fukomys-damarensis                   |

|                                   |                                                   |                                                                                       |
|-----------------------------------|---------------------------------------------------|---------------------------------------------------------------------------------------|
| <i>Fundulus heteroclitus</i>      | Mummichog killifish<br>Guppies                    | Metazoa-Chordata-Actinopteri-Cyprinodontiformes-Fundulidae-Fundulus-heteroclitus      |
| <i>Gadus morhua</i>               | Cod                                               | Metazoa-Chordata-Actinopteri-Gadiformes-Gadidae-Gadus-morhua                          |
| <i>Galemys pyrenaicus</i>         | Pyrenean desman                                   | Metazoa-Chordata-Mammalia-Eulipotyphla-Talpidae-Galemys-pyrenaicus                    |
| <i>Galeopterus variegatus</i>     | Sunda flying lemur                                | Metazoa-Chordata-Mammalia-Dermoptera-Cynocephalidae-Galeopterus-variegatus            |
| <i>Galleria mellonella</i>        | Greater wax moth                                  | Metazoa-Arthropoda-Insecta-Lepidoptera-Pyralidae-Galleria-mellonella                  |
| <i>Gigantopelta aegis</i>         | Deep sea snail                                    | Metazoa-Mollusca-Gastropoda-Order_unclassified-Peltopiridae-Gigantopelta-aegis        |
| <i>Globicephala melas</i>         | Long-finned pilot whale                           | Metazoa-Chordata-Mammalia-Artiodactyla-Delphinidae-Globicephala-melas                 |
| <i>Gopherus evgoodei</i>          | Goodes thornscrub tortoise                        | Metazoa-Chordata-Class_unclassified-Testudines-Testudinidae-Gopherus-evgoodei         |
| <i>Haemonchus contortus</i>       | Nematode V                                        | Metazoa-Nematoda-Chromadorea-Strongylida-Haemonchidae-Haemonchus-contortus            |
| <i>Haliotis rubra</i>             | Black liped abalone                               | Metazoa-Mollusca-Gastropoda-Lepetellida-Haliotidae-Haliotis-rubra                     |
| <i>Haliotis rufescens</i>         | Red abalone                                       | Metazoa-Mollusca-Gastropoda-Lepetellida-Haliotidae-Haliotis-rufescens                 |
| <i>Helobdella robusta</i>         | Leech                                             | Metazoa-Annelida-Clitellata-Rhynchobdellida-Glossiphoniidae-Helobdella-robusta        |
| <i>Heterocephalus glaber</i>      | African naked mole rat                            | Metazoa-Chordata-Mammalia-Rodentia-Bathyergidae-Heterocephalus-glaber                 |
| <i>Hippopotamus amphibius</i>     | Hippo                                             | Metazoa-Chordata-Mammalia-Artiodactyla-Hippopotamidae-Hippopotamus-amphibius          |
| <i>Hipposideros armiger</i>       | Rhinolophid Hipposideridae<br>great roundleaf bat | Metazoa-Chordata-Mammalia-Chiroptera-Hipposideridae-Hipposideros-armiger              |
| <i>Hirudo medicinalis</i>         | Medicinal leech                                   | Metazoa-Annelida-Clitellata-Hirudinida-Hirudinidae-Hirudo-medicinalis                 |
| <i>Hofstenia miamia</i>           | Acoel flatworm                                    | Metazoa-Xenacoelomorpha-Class_unclassified-Acoela-Hofsteniidae-Hofstenia-miamia       |
| <i>Homarus americanus</i>         | American lobster                                  | Metazoa-Arthropoda-Malacostraca-Decapoda-Nephropidae-Homarus-americanus               |
| <i>Homo sapiens</i>               | Human                                             | Metazoa-Chordata-Mammalia-Primates-Hominidae-Homo-sapiens                             |
| <i>Hormiphora californensis</i>   | Ctenophore                                        | Metazoa-Ctenophora-Tentaculata-Cydippida-Pleurobrachiidae-Hormiphora-californensis    |
| <i>Hydra viridissima</i>          | Green hydra                                       | Metazoa-Cnidaria-Hydrozoa-Anthoathecata-Hydridae-Hydra-viridissima                    |
| <i>Hydra vulgaris</i>             | Hydra                                             | Metazoa-Cnidaria-Hydrozoa-Anthoathecata-Hydridae-Hydra-vulgaris                       |
| <i>Hydrophis curtus</i>           | Shaw's sea snake                                  | Metazoa-Chordata-Lepidosauria-Squamata-Hydrophiidae-Hydrophis-curtus                  |
| <i>Hymenolepis microstoma</i>     | Rodent tapeworm                                   | Metazoa-Platyhelminthes-Cestoda-Cyclophyllidea-Hymenolepididae-Hymenolepis-microstoma |
| <i>Hyposmocoma kahamanoa</i>      | Oahu moth                                         | Metazoa-Arthropoda-Insecta-Lepidoptera-Cosmopterigidae-Hyposmocoma-kahamanoa          |
| <i>Hypsibius dujardini</i>        | Tardigrade                                        | Metazoa-Tardigrada-Eutardigrada-Parachela-Hypsibiidae-Hypsibius-dujardini             |
| <i>Ictalurus punctatus</i>        | Channel catfish                                   | Metazoa-Chordata-Actinopteri-Siluriformes-Ictaluridae-Ictalurus-punctatus             |
| <i>Kryptolebias marmoratus</i>    | Mangrove rivulus killifish<br>Guppies             | Metazoa-Chordata-Actinopteri-Cyprinodontiformes-Rivulidae-Kryptolebias-marmoratus     |
| <i>Ladona fulva</i>               | Scarce chaser                                     | Metazoa-Arthropoda-Insecta-Odonata-Libellulidae-Ladona-fulva                          |
| <i>Lagenorhynchus obliquidens</i> | Pacific white-sided dolphin                       | Metazoa-Chordata-Mammalia-Artiodactyla-Delphinidae-Lagenorhynchus-obliquidens         |



|                                    |                                                         |                                                                                               |
|------------------------------------|---------------------------------------------------------|-----------------------------------------------------------------------------------------------|
| <i>Lamellibrachia luymesii</i>     | Deep sea worm                                           | Metazoa-Annelida-Class_unresolved-Order_unresolved-Family_unresolved-Lamellibrachia-luymsi    |
| <i>Laticauda laticaudata</i>       | Blue-ringed sea krait                                   | Metazoa-Chordata-Lepidosauria-Squamata-Elapidae-Laticauda-laticaudata                         |
| <i>Latimeria chalumnae</i>         | Coelacanth                                              | Metazoa-Chordata-Class_unclassified-Coelacanthiformes-Coelacanthidae-Latimeria-chalumnae      |
| <i>Lautoconus ventricosus</i>      | Cone snail                                              | Metazoa-Mollusca-Class_unresolved-Order_unresolved-Family_unresolved-Lautoconus-ventricosus   |
| <i>Lepas anserifera</i>            | Gooseneck barnacle                                      | Metazoa-Arthropoda-Hexanauplia-Pedunculata-Lepadidae-Lepas-anserifera                         |
| <i>Lepeoptheirus salmonis</i>      | Sea louse copepod                                       | Metazoa-Arthropoda-Class_unresolved-Order_unresolved-Family_unresolved-Lepeoptheirus-salmonis |
| <i>Lepidurus apus_apus</i>         | Tadpole shrimp                                          | Metazoa-Arthropoda-Branchiopoda-Notostraca-Triopsidae-Lepidurus-apus_apus                     |
| <i>Lepidurus apus_lubbocki</i>     | Tadpole shrimp                                          | Metazoa-Arthropoda-Branchiopoda-Notostraca-Triopsidae-Lepidurus-apus_lubbocki                 |
| <i>Lepidurus arcticus</i>          | Tadpole shrimp                                          | Metazoa-Arthropoda-Branchiopoda-Notostraca-Triopsidae-Lepidurus-arcticus                      |
| <i>Leptobrachium leishanense</i>   | Leishan spiny toad                                      | Metazoa-Chordata-Amphibia-Anura-Megophryidae-Leptobrachium-leishanense                        |
| <i>Limnoperna fortunei</i>         | Golden mussel                                           | Metazoa-Mollusca-Bivalvia-Mytiloidea-Mytilidae-Limnoperna-fortunei                            |
| <i>Limulus polyphemus</i>          | Horseshoe crab                                          | Metazoa-Arthropoda-Merostomata-Xiphosura-Limulidae-Limulus-polyphemus                         |
| <i>Lingula anatina</i>             | Lampshell                                               | Metazoa-Brachiopoda-Lingulata-Lingulida-Lingulidae-Lingula-anatina                            |
| <i>Liparis tanakae</i>             | Tanaka snailfish                                        | Metazoa-Chordata-Actinopteri-Perciformes-Liparidae-Liparis-tanakae                            |
| <i>Lipotes vexillifer</i>          | Yangtze River dolphin                                   | Metazoa-Chordata-Mammalia-Artiodactyla-Lipotidae-Lipotes-vexillifer                           |
| <i>Lottia gigantea</i>             | Owl limpet                                              | Metazoa-Mollusca-Gastropoda-Order_unclassified-Lottiidae-Lottia-gigantea                      |
| <i>Loxodonta africana</i>          | Afrotherian african savanna elephant                    | Metazoa-Chordata-Mammalia-Proboscidea-Elephantidae-Loxodonta-africana                         |
| <i>Lytechinus variegatus</i>       | Green sea urchin                                        | Metazoa-Echinodermata-Echinoidea-Temnopleuroidea-Toxopneustidae-Lytechinus-variegatus         |
| <i>Macrobrachium nipponense</i>    | Oriental river prawn                                    | Metazoa-Arthropoda-Malacostraca-Decapoda-Palaemonidae-Macrobrachium-nipponense                |
| <i>Macrostomum lignano</i>         | Marine flatworm                                         | Metazoa-Platyhelminthes-Rhabditophora-Macrostomida-Macrostomidae-Macrostomum-lignano          |
| <i>Manis pentadactyla</i>          | Chinese pangolin                                        | Metazoa-Chordata-Mammalia-Pholidota-Manidae-Manis-pentadactyla                                |
| <i>Margaritifera margaritifera</i> | Sea2Water pearl mussel Unio                             | Metazoa-Mollusca-Bivalvia-Unionida-Margaritiferidae-Margaritifera-margaritifera               |
| <i>Marisa cornuarietis</i>         | Colombian ramshorn apple snail                          | Metazoa-Mollusca-Gastropoda-Architaenioglossa-Ampullariidae-Marisa-cornuarietis               |
| <i>Mercenaria mercenaria</i>       | Hard clam                                               | Metazoa-Mollusca-Bivalvia-Venerida-Veneridae-Mercenaria-mercenaria                            |
| <i>Meriones unguiculatus</i>       | Mongolian gerbil                                        | Metazoa-Chordata-Mammalia-Rodentia-Muridae-Meriones-unguiculatus                              |
| <i>Mesocricetus auratus</i>        | Golden hamster                                          | Metazoa-Chordata-Mammalia-Rodentia-Cricetidae-Mesocricetus-auratus                            |
| <i>Metaphire vulgaris</i>          | Earthworm                                               | Metazoa-Annelida-Clitellata-Crassiclitellata-Megascolecidae-Metaphire-vulgaris                |
| <i>Microcebus murinus</i>          | Grey mouse lemur                                        | Metazoa-Chordata-Mammalia-Primates-Cheirogaleidae-Microcebus-murinus                          |
| <i>Miniopterus natalensis</i>      | Vespertilionoidid Miniopteridae Natal long-fingered bat | Metazoa-Chordata-Mammalia-Chiroptera-Vespertilionidae-Miniopterus-natalensis                  |

|                                                    |                                                   |                                                                                                          |
|----------------------------------------------------|---------------------------------------------------|----------------------------------------------------------------------------------------------------------|
| <i>Mizuhopecten yessoensis</i>                     | Giant exo scallop                                 | Metazoa-Mollusca-Bivalvia-Pectinida-Pectinidae-Mizuhopecten-yessoensis                                   |
| <i>Mnemiopsis leidyi</i>                           | Warty comb jelly                                  | Metazoa-Ctenophora-Tentaculata-Lobata-Bolinopsidae-Mnemiopsis-leidyi                                     |
| <i>Modiolus philippinarum</i>                      | Philippine horse mussel                           | Metazoa-Mollusca-Bivalvia-Mytiloidea-Mytilidae-Modiolus-philippinarum                                    |
| <i>Molossus molossus</i>                           | Vespertilionoidid Molossidae Pallas's mastiff bat | Metazoa-Chordata-Mammalia-Chiroptera-Molossidae-Molossus-molossus                                        |
| <i>Monodelphis domestica</i>                       | Marsupial Grey short-tailed opossum               | Metazoa-Chordata-Mammalia-Didelphimorphia-Didelphidae-Monodelphis-domestica                              |
| <i>Monodon monoceros</i>                           | Narwhal                                           | Metazoa-Chordata-Mammalia-Artiodactyla-Monodontidae-Monodon-monoceros                                    |
| <i>Monosiga brevicollis</i>                        | Unicellular choanoflagellate                      | Kingdom_unclassified-Phylum_unclassified-Choanoflagellata-Craspedida-Salpingoecidae-Monosiga-brevicollis |
| <i>Morbakka virulenta</i>                          | Box jellyfish                                     | Metazoa-Cnidaria-Cubozoa-Carybdeida-Carukiidae-Morbakka-virulenta                                        |
| <i>Mus musculus</i>                                | Mouse                                             | Metazoa-Chordata-Mammalia-Rodentia-Muridae-Mus-musculus                                                  |
| <i>Mytilus coruscus</i>                            | Korean mussel                                     | Metazoa-Mollusca-Bivalvia-Mytiloidea-Mytilidae-Mytilus-coruscus                                          |
| <i>Mytilus edulis</i>                              | Blue mussel                                       | Metazoa-Mollusca-Bivalvia-Mytiloidea-Mytilidae-Mytilus-edulis                                            |
| <i>Mytilus galloprovincialis</i>                   | Mediterranean mussel                              | Metazoa-Mollusca-Bivalvia-Mytiloidea-Mytilidae-Mytilus-galloprovincialis                                 |
| <i>Naja naja</i>                                   | Indian cobra                                      | Metazoa-Chordata-Lepidosauria-Squamata-Elapidae-Naja-naja                                                |
| <i>Nannospalax galili</i>                          | Upper Galilee mountains blind mole rat            | Metazoa-Chordata-Mammalia-Rodentia-Spalacidae-Nannospalax-galili                                         |
| <i>Nautilus pompilius</i>                          | Nautilus                                          | Metazoa-Mollusca-Cephalopoda-Nautilida-Nautilidae-Nautilus-pompilius                                     |
| <i>Nematostella vectensis</i>                      | Starlet sea anemone                               | Metazoa-Cnidaria-Anthozoa-Actiniaria-Edwardsiidae-Nematostella-vectensis                                 |
| <i>Neoceratodus forsteri</i>                       | Australian lungfish                               | Metazoa-Chordata-Class_unclassified-Ceratodontiformes-Ceratodontidae-Neoceratodus-forsteri               |
| <i>Neophocaena asiaeorientalis_asiaeorientalis</i> | Yangtze finless porpoise                          | Metazoa-Chordata-Mammalia-Artiodactyla-Phocoenidae-Neophocaena-asiaeorientalis_asiaeorientalis           |
| <i>Nilaparvata lugens</i>                          | Brown planthopper                                 | Metazoa-Arthropoda-Insecta-Hemiptera-Delphacidae-Nilaparvata-lugens                                      |
| <i>Notechis scutatus</i>                           | Mainland tiger snake                              | Metazoa-Chordata-Lepidosauria-Squamata-Elapidae-Notechis-scutatus                                        |
| <i>Nothobranchius furzeri</i>                      | Torquoise killifish Guppies                       | Metazoa-Chordata-Actinopteri-Cyprinodontiformes-Nothobranchiidae-Nothobranchius-furzeri                  |
| <i>Notospermus geniculatus</i>                     | Nemertean worm                                    | Metazoa-Nemertea-Pilidiophora-Heteronemertea-Lineidae-Notospermus-geniculatus                            |
| <i>Nymphon striatum</i>                            | Sea spider                                        | Metazoa-Arthropoda-Pycnogonida-Pantopoda-Nymphonidae-Nymphon-striatum                                    |
| <i>Octodon degus</i>                               | Degu                                              | Metazoa-Chordata-Mammalia-Rodentia-Octodontidae-Octodon-degus                                            |
| <i>Octopus sinensis</i>                            | East asian common octopus                         | Metazoa-Mollusca-Cephalopoda-Octopoda-Octopodidae-Octopus-sinensis                                       |
| <i>Oikopleura dioica</i>                           | Pelagic seasquirt                                 | Metazoa-Chordata-Appendicularia-Copelata-Oikopleuridae-Oikopleura-dioica                                 |
| <i>Onchocerca volvulus</i>                         | Nematode III                                      | Metazoa-Nematoda-Chromadorea-Rhabditida-Onchocercidae-Onchocerca-volvulus                                |
| <i>Oncorhynchus mykiss</i>                         | Rainbow trout                                     | Metazoa-Chordata-Actinopteri-Salmoniformes-Salmonidae-Oncorhynchus-mykiss                                |
| <i>Orcinus orca</i>                                | Killer whale                                      | Metazoa-Chordata-Mammalia-Artiodactyla-Delphinidae-Orcinus-orca                                          |

|                                      |                                                    |                                                                                                |
|--------------------------------------|----------------------------------------------------|------------------------------------------------------------------------------------------------|
| <i>Ornithorhynchus anatinus</i>      | Montreme platypus                                  | Metazoa-Chordata-Mammalia-Monotremata-Ornithorhynchidae-Ornithorhynchus-anatinus               |
| <i>Orycteropus afer_afer</i>         | Afrotherian aardvark                               | Metazoa-Chordata-Mammalia-Tubulidentata-Orycteropodidae-Orycteropus-afer_afer                  |
| <i>Oryctolagus cuniculus</i>         | Lagomorphan rabbit                                 | Metazoa-Chordata-Mammalia-Lagomorpha-Leporidae-Oryctolagus-cuniculus                           |
| <i>Oryzias latipes</i>               | Medaka Guppies                                     | Metazoa-Chordata-Actinopteri-Beloniformes-Adrianichthyidae-Oryzias-latipes                     |
| <i>Owenia fusiformis</i>             | Owenid tubeworm                                    | Metazoa-Annelida-Polychaeta-Sabellida-Oweniidae-Owenia-fusiformis                              |
| <i>Panagrolaimus es5</i>             | Panagrolaimus nematode IV                          | Metazoa-Nematoda-Class_unresolved-Order_unresolved-Family_unresolved-Panagrolaimus-es5         |
| <i>Panagrolaimus ps1159</i>          | Panagrolaimus nematode IV                          | Metazoa-Nematoda-Class_unresolved-Order_unresolved-Family_unresolved-Panagrolaimus-ps1159      |
| <i>Panagrolaimus superbus</i>        | Panagrolaimus nematode IV                          | Metazoa-Nematoda-Chromadorea-Rhabditida-Panagrolaimidae-Panagrolaimus-superbus                 |
| <i>Pangasianodon hypophthalmus</i>   | Iridescent shark catfish                           | Metazoa-Chordata-Actinopteri-Siluriformes-Pangasiidae-Pangasianodon-hypophthalmus              |
| <i>Papilio xuthus</i>                | Asian swallowtail butterfly                        | Metazoa-Arthropoda-Insecta-Lepidoptera-Papilionidae-Papilio-xuthus                             |
| <i>Paraescarpia echinospica</i>      | Vestimentiferan tubeworm                           | Metazoa-Annelida-Polychaeta-Sabellida-Siboglinidae-Paraescarpia-echinospica                    |
| <i>Paramormyrops kingsleyae</i>      | Elephantfish electric fish                         | Metazoa-Chordata-Actinopteri-Osteoglossiformes-Mormyridae-Paramormyrops-kingsleyae             |
| <i>Pararge aegeria</i>               | Specked wood butterfly                             | Metazoa-Arthropoda-Insecta-Lepidoptera-Nymphalidae-Pararge-aegeria                             |
| <i>Patiria miniata</i>               | Bat star                                           | Metazoa-Echinodermata-Asteroidea-Valvatida-Asterinidae-Patiria-miniata                         |
| <i>Pecten maximus</i>                | Great scallop                                      | Metazoa-Mollusca-Bivalvia-Pectinida-Pectinidae-Pecten-maximus                                  |
| <i>Pediculus humanus_corporis</i>    | Human louse                                        | Metazoa-Arthropoda-Insecta-Phthiraptera-Pediculidae-Pediculus-humanus_corporis                 |
| <i>Penaeus monodon</i>               | Giant tiger prawn                                  | Metazoa-Arthropoda-Malacostraca-Decapoda-Penaeidae-Penaeus-monodon                             |
| <i>Periophthalmus magnuspinnatus</i> | Mudskipper Gobies                                  | Metazoa-Chordata-Actinopteri-Gobiiformes-Gobiidae-Periophthalmus-magnuspinnatus                |
| <i>Perna viridis</i>                 | Asian green mussel                                 | Metazoa-Mollusca-Bivalvia-Mytiloidea-Mytilidae-Perna-viridis                                   |
| <i>Petromyzon marinus</i>            | Inshore lamprey                                    | Metazoa-Chordata-Hypermartia-Petromyzontiformes-Petromyzontidae-Petromyzon-marinus             |
| <i>Phascolarctos cinereus</i>        | Marsupial Koala                                    | Metazoa-Chordata-Mammalia-Diprotodontia-Phascolarctidae-Phascolarctos-cinereus                 |
| <i>Phoca vitulina</i>                | Harbor seal                                        | Metazoa-Chordata-Mammalia-Carnivora-Phocidae-Phoca-vitulina                                    |
| <i>Phocoena sinus</i>                | Vaquita                                            | Metazoa-Chordata-Mammalia-Artiodactyla-Phocoenidae-Phocoena-sinus                              |
| <i>Phoronis australis</i>            | Phoronid worm                                      | Metazoa-Phoronida-Class_unclassified-Order_unclassified-Family_unclassified-Phoronis-australis |
| <i>Photinus pyralis</i>              | Common eastern firefly                             | Metazoa-Arthropoda-Insecta-Coleoptera-Lampyridae-Photinus-pyralis                              |
| <i>Phyllostomus discolor</i>         | Noctilionoidid Phyllostomidae pale spear-nosed bat | Metazoa-Chordata-Mammalia-Chiroptera-Phyllostomidae-Phyllostomus-discolor                      |
| <i>Physeter catodon</i>              | Sperm whale                                        | Metazoa-Chordata-Mammalia-Artiodactyla-Physeteridae-Physeter-catodon                           |
| <i>Pinctada fucata</i>               | Akoya pearl oyster                                 | Metazoa-Mollusca-Bivalvia-Pterioidea-Pteriidae-Pinctada-fucata                                 |

|                                  |                                                             |                                                                                                     |
|----------------------------------|-------------------------------------------------------------|-----------------------------------------------------------------------------------------------------|
| <i>Pipistrellus kuhlii</i>       | Vespertilionoidid<br>Vespertilionidae Kuhl's<br>pipistrelle | Metazoa-Chordata-Mammalia-Chiroptera-<br>Vespertilionidae-Pipistrellus-kuhlii                       |
| <i>Plakobranthus ocellatus</i>   | Sea slug                                                    | Metazoa-Mollusca-Gastropoda-Order_unclassified-<br>Plakobranthidae-Plakobranthus-ocellatus          |
| <i>Plectus sambesii</i>          | Nematode C                                                  | Metazoa-Nematoda-Chromadorea-Plectida-Plectidae-<br>Plectus-sambesii                                |
| <i>Plutella xylostella</i>       | Diamondback moth                                            | Metazoa-Arthropoda-Insecta-Lepidoptera-Plutellidae-<br>Plutella-xylostella                          |
| <i>Poecilia latipinna</i>        | Molly Guppies                                               | Metazoa-Chordata-Actinopteri-Cyprinodontiformes-<br>Poeciliidae-Poecilia-latipinna                  |
| <i>Poeciliopsis occidentalis</i> | Topminnow Guppies                                           | Metazoa-Chordata-Actinopteri-Cyprinodontiformes-<br>Poeciliidae-Poeciliopsis-occidentalis           |
| <i>Polistes fuscatus</i>         | common paper wasp                                           | Metazoa-Arthropoda-Insecta-Hymenoptera-Vespidae-<br>Polistes-fuscatus                               |
| <i>Pollicipes pollicipes</i>     | Barnacle                                                    | Metazoa-Arthropoda-Hexanauplia-Pedunculata-<br>Pollicipedidae-Pollicipes-pollicipes                 |
| <i>Polypedilum vanderplanki</i>  | Sleeping chironomid midge                                   | Metazoa-Arthropoda-Insecta-Diptera-Chironomidae-<br>Polypedilum-vanderplanki                        |
| <i>Pomacea canaliculata</i>      | Golden apple snail                                          | Metazoa-Mollusca-Gastropoda-Architaenioglossa-<br>Ampullariidae-Pomacea-canaliculata                |
| <i>Pontoporia blainvillei</i>    | Franciscana                                                 | Metazoa-Chordata-Mammalia-Artiodactyla-<br>Pontoporiidae-Pontoporia-blainvillei                     |
| <i>Portunus trituberculatus</i>  | Swimming crab                                               | Metazoa-Arthropoda-Malacostraca-Decapoda-<br>Portunidae-Portunus-trituberculatus                    |
| <i>Potamilus streckersoni</i>    | Sea2Water mussel Unio                                       | Metazoa-Mollusca-Bivalvia-Unionida-Unionidae-<br>Potamilus-streckersoni                             |
| <i>Priapulus caudatus</i>        | Priapulid worm                                              | Metazoa-Priapulida-Priapulimorpha-Priapulimorphida-<br>Priapulidae-Priapulus-caudatus               |
| <i>Pristionchus pacificus</i>    | Genetic model nematode V                                    | Metazoa-Nematoda-Chromadorea-Rhabditida-<br>Neodiplogasteridae-Pristionchus-pacificus               |
| <i>Procambarus virginalis</i>    | Crayfish                                                    | Metazoa-Arthropoda-Malacostraca-Decapoda-<br>Cambaridae-Procambarus-virginalis                      |
| <i>Propanagrolaimus ju765</i>    | Propanagrolaimus<br>nematode IV                             | Metazoa-Nematoda-Class_unresolved-<br>Order_unresolved-Family_unresolved-<br>Propanagrolaimus-ju765 |
| <i>Protopterus annectens</i>     | African lungfish                                            | Metazoa-Chordata-Class_unclassified-<br>Ceratodontiformes-Protopteridae-Protopterus-annectens       |
| <i>Pseudoliparis swirei</i>      | Mariana hadal snailfish                                     | Metazoa-Chordata-Actinopteri-Perciformes-Liparidae-<br>Pseudoliparis-swirei                         |
| <i>Pseudoliparis YAP</i>         | Hadal snailfish                                             | Metazoa-Chordata-Class_unresolved-Order_unresolved-<br>Family_unresolved-Pseudoliparis-YAP          |
| <i>Pseudonaja textilis</i>       | Eastern brown snake                                         | Metazoa-Chordata-Lepidosauria-Squamata-Elapidae-<br>Pseudonaja-textilis                             |
| <i>Pygocentrus nattereri</i>     | Piranha                                                     | Metazoa-Chordata-Actinopteri-Characiformes-<br>Serrasalminidae-Pygocentrus-nattereri                |
| <i>Ramazzottius varieornatus</i> | Tardigrade                                                  | Metazoa-Tardigrada-Eutardigrada-Parachela-<br>Ramazzottiidae-Ramazzottius-varieornatus              |
| <i>Rana temporaria</i>           | Frog                                                        | Metazoa-Chordata-Amphibia-Anura-Ranidae-Rana-<br>temporaria                                         |
| <i>Rattus norvegicus</i>         | Rat                                                         | Metazoa-Chordata-Mammalia-Rodentia-Muridae-Rattus-<br>norvegicus                                    |
| <i>Rhinolophus ferrumequinum</i> | Rhinolophid Rhinolophidae<br>greater horseshoe bat          | Metazoa-Chordata-Mammalia-Chiroptera-Rhinolophidae-<br>Rhinolophus-ferrumequinum                    |
| <i>Rhizomys pruinosus</i>        | Hoary bamboo rat                                            | Metazoa-Chordata-Mammalia-Rodentia-Spalacidae-<br>Rhizomys-pruinosus                                |
| <i>Rhopalosiphum maidis</i>      | Corn leaf aphid                                             | Metazoa-Arthropoda-Insecta-Hemiptera-Aphididae-<br>Rhopalosiphum-maidis                             |
| <i>Rhopilema esculentum</i>      | Flame jellyfish                                             | Metazoa-Cnidaria-Scyphozoa-Rhizostomeae-<br>Rhizostomatidae-Rhopilema-esculentum                    |

|                                      |                                           |                                                                                                                |
|--------------------------------------|-------------------------------------------|----------------------------------------------------------------------------------------------------------------|
| <i>Rotaria socialis</i>              | Rotifer                                   | Metazoa-Rotifera-Eurotatoria-Order_unclassified-Family_unclassified-Rotaria-socialis                           |
| <i>Rousettus aegyptiacus</i>         | Pteropodid Pteropodidae egyptian rousette | Metazoa-Chordata-Mammalia-Chiroptera-Pteropodidae-Rousettus-aegyptiacus                                        |
| <i>Saccoglossus kowalevskii</i>      | Acorn worm                                | Metazoa-Hemichordata-Enteropneusta-Order_unclassified-Harrimaniidae-Saccoglossus-kowalevskii                   |
| <i>Saccostrea glomerata</i>          | Sydney rock oyster                        | Metazoa-Mollusca-Bivalvia-Ostreida-Ostreidae-Saccostrea-glomerata                                              |
| <i>Salmo salar</i>                   | Salmon                                    | Metazoa-Chordata-Actinopteri-Salmoniformes-Salmonidae-Salmo-salar                                              |
| <i>Salvelinus namaycush</i>          | Lake trout                                | Metazoa-Chordata-Actinopteri-Salmoniformes-Salmonidae-Salvelinus-namaycush                                     |
| <i>Sarcophilus harrisii</i>          | Marsupial Tasmanian devil                 | Metazoa-Chordata-Mammalia-Dasyuromorphia-Dasyuridae-Sarcophilus-harrisii                                       |
| <i>Scapharca broughtonii</i>         | Blood clam                                | Metazoa-Mollusca-Class_unresolved-Order_unresolved-Family_unresolved-Scapharca-broughtonii                     |
| <i>Schistosoma mansoni</i>           | Blood fluke                               | Metazoa-Platyhelminthes-Trematoda-Strigeidida-Schistosomatidae-Schistosoma-mansoni                             |
| <i>Schmidtea mediterranea</i>        | Sea2Water triclad flatworm                | Metazoa-Platyhelminthes-Rhabditophora-Tricladida-Dugesidae-Schmidtea-mediterranea                              |
| <i>Scleropages formosus</i>          | Asian arowana electric fish               | Metazoa-Chordata-Actinopteri-Osteoglossiformes-Osteoglossidae-Scleropages-formosus                             |
| <i>Sepia pharaonis</i>               | Pharaoh cuttlefish                        | Metazoa-Mollusca-Cephalopoda-Sepiida-Sepiidae-Sepia-pharaonis                                                  |
| <i>Sinocyclocheilus anshuiensis</i>  | Barbine                                   | Metazoa-Chordata-Actinopteri-Cypriniformes-Cyprinidae-Sinocyclocheilus-anshuiensis                             |
| <i>Sinocyclocheilus grahami</i>      | Golden barbel barbine                     | Metazoa-Chordata-Actinopteri-Cypriniformes-Cyprinidae-Sinocyclocheilus-grahami                                 |
| <i>Sinocyclocheilus rhinoceros</i>   | Barbine                                   | Metazoa-Chordata-Actinopteri-Cypriniformes-Cyprinidae-Sinocyclocheilus-rhinoceros                              |
| <i>Sinonovacula constricta</i>       | Razor clam                                | Metazoa-Mollusca-Bivalvia-Cardiida-Solecurtidae-Sinonovacula-constricta                                        |
| <i>Solenopsis invicta</i>            | Fire ant                                  | Metazoa-Arthropoda-Insecta-Hymenoptera-Formicidae-Solenopsis-invicta                                           |
| <i>Sorex araneus</i>                 | European shrew                            | Metazoa-Chordata-Mammalia-Eulipotyphla-Soricidae-Sorex-araneus                                                 |
| <i>Sousa chinensis</i>               | Indo-pacific humpbacked dolphin           | Metazoa-Chordata-Mammalia-Artiodactyla-Delphinidae-Sousa-chinensis                                             |
| <i>Sphaeroforma arctica</i>          | Unicell                                   | Kingdom_unclassified-Phylum_unclassified-Ichthyosporea-Ichthyophonida-Family_unclassified-Sphaeroforma-arctica |
| <i>Sphenodon punctatus</i>           | Tuatara                                   | Metazoa-Chordata-Lepidosauria-Sphenodontia-Sphenodontidae-Sphenodon-punctatus                                  |
| <i>Spodoptera frugiperda</i>         | Fall armyworm moth                        | Metazoa-Arthropoda-Insecta-Lepidoptera-Noctuidae-Spodoptera-frugiperda                                         |
| <i>Streblospio benedicti</i>         | Ram's horn worm                           | Metazoa-Annelida-Polychaeta-Spionida-Spionidae-Streblospio-benedicti                                           |
| <i>Strix occidentalis_caurina</i>    | Northern spotted owl                      | Metazoa-Chordata-Aves-Strigiformes-Strigidae-Strix-occidentalis_caurina                                        |
| <i>Strongylocentrotus purpuratus</i> | Sea urchin                                | Metazoa-Echinodermata-Echinoidea-Camarodonta-Strongylocentrotidae-Strongylocentrotus-purpuratus                |
| <i>Styela clava</i>                  | Stalked sea squirt                        | Metazoa-Chordata-Ascidacea-Stolidobranchia-Styelidae-Styela-clava                                              |
| <i>Sus scrofa</i>                    | Pig                                       | Metazoa-Chordata-Mammalia-Artiodactyla-Suidae-Sus-scrofa                                                       |
| <i>Taenia multiceps</i>              | Tapeworm                                  | Metazoa-Platyhelminthes-Cestoda-Cyclophyllidea-Taeniidae-Taenia-multiceps                                      |
| <i>Taeniopygia guttata</i>           | Zebra finch                               | Metazoa-Chordata-Aves-Passeriformes-Estrildidae-Taeniopygia-guttata                                            |

|                                       |                                |                                                                                            |
|---------------------------------------|--------------------------------|--------------------------------------------------------------------------------------------|
| <i>Talpa occidentalis</i>             | Iberian mole                   | Metazoa-Chordata-Class_unresolved-Order_unresolved-Family_unresolved-Talpa-occidentali     |
| <i>Teleogryllus occipitalis</i>       | Cricket                        | Metazoa-Arthropoda-Insecta-Orthoptera-Gryllidae-Teleogryllus-occipitalis                   |
| <i>Tetraodon nigroviridis</i>         | Pufferfish                     | Metazoa-Chordata-Actinopteri-Tetraodontiformes-Tetraodontidae-Tetraodon-nigroviridis       |
| <i>Thelohanellus kitauei</i>          | Mxyozoan parasite              | Metazoa-Cnidaria-Myxozoa-Bivalvulida-Myxobolidae-Thelohanellus-kitauei                     |
| <i>Thrips palmi</i>                   | Thrip                          | Metazoa-Arthropoda-Insecta-Thysanoptera-Thripidae-Thrips-palmi                             |
| <i>Tigriopus californicus</i>         | Tigger Pod copepod             | Metazoa-Arthropoda-Hexanauplia-Harpacticoida-Harpacticidae-Tigriopus-californicus          |
| <i>Tribolium madens</i>               | Black flour beetle             | Metazoa-Arthropoda-Insecta-Coleoptera-Tenebrionidae-Tribolium-madens                       |
| <i>Trichechus manatus_latirostris</i> | Florida manatee                | Metazoa-Chordata-Mammalia-Sirenia-Trichechidae-Trichechus-manatus_latirostris              |
| <i>Trichoplax adhaerens</i>           | Placozoan                      | Metazoa-Placozoa-Class_unclassified-Order_unclassified-Trichoplacidae-Trichoplax-adhaerens |
| <i>Triops cancriformis</i>            | Tadpole shrimp                 | Metazoa-Arthropoda-Branchiopoda-Notostraca-Triopsidae-Triops-cancriformis                  |
| <i>Triops longicaudatus</i>           | Tadpole shrimp                 | Metazoa-Arthropoda-Branchiopoda-Notostraca-Triopsidae-Triops-longicaudatus                 |
| <i>Tupaia chinensis</i>               | Scandentian chinese tree shrew | Metazoa-Chordata-Mammalia-Scandentia-Tupaiidae-Tupaia-chinensis                            |
| <i>Tursiops truncatus</i>             | Common bottlenose dolphin      | Metazoa-Chordata-Mammalia-Artiodactyla-Delphinidae-Tursiops-truncatus                      |
| <i>Vicugna vicugna_mensalis</i>       | Vicugna                        | Metazoa-Chordata-Mammalia-Artiodactyla-Camelidae-Vicugna-vicugna_mensalis                  |
| <i>Vombatus ursinus</i>               | Marsupial Common wombat        | Metazoa-Chordata-Mammalia-Diprotodontia-Vombatidae-Vombatus-ursinus                        |
| <i>Xenopus laevis</i>                 | African clawed frog            | Metazoa-Chordata-Amphibia-Anura-Pipidae-Xenopus-laevis                                     |
| <i>Xenopus tropicalis</i>             | Western clawed frog            | Metazoa-Chordata-Amphibia-Anura-Pipidae-Xenopus-tropicalis                                 |
| <i>Zalophus californianus</i>         | Sea lion                       | Metazoa-Chordata-Mammalia-Carnivora-Otariidae-Zalophus-californianus                       |
| <i>Zerene cesonia</i>                 | Dogface butterfly              | Metazoa-Arthropoda-Insecta-Lepidoptera-Pieridae-Zerene-cesonia                             |
| <i>Zootoca vivipara</i>               | Common lizard                  | Metazoa-Chordata-Lepidosauria-Squamata-Lacertidae-Zootoca-vivipara                         |

## Supplementary Table S2 – Species selected for genome-scale phylogenetic analysis of P2XRs.

Species used in the creation of figure 7 and supplementary figure S4 and the source for each genome.

| Organism                 | Location of genome data                                                                                                                                                                                                                                                                                                                                     |
|--------------------------|-------------------------------------------------------------------------------------------------------------------------------------------------------------------------------------------------------------------------------------------------------------------------------------------------------------------------------------------------------------|
| Dictyostelium discoideum | <a href="https://www.ncbi.nlm.nih.gov/data-hub/genome/GCF_000004695.1/">https://www.ncbi.nlm.nih.gov/data-hub/genome/GCF_000004695.1/</a>                                                                                                                                                                                                                   |
| Monosiga brevicollis     | <a href="https://www.ncbi.nlm.nih.gov/genome/713?genome_assembly_id=30632">https://www.ncbi.nlm.nih.gov/genome/713?genome_assembly_id=30632</a>                                                                                                                                                                                                             |
| Amphimedon queenslandica | <a href="https://www.ncbi.nlm.nih.gov/genome/annotation_euk/Amphimedon_queenslandica/102/">https://www.ncbi.nlm.nih.gov/genome/annotation_euk/Amphimedon_queenslandica/102/</a>                                                                                                                                                                             |
| Mnemiopsis leidyi        | <a href="https://metazoa.ensembl.org/Mnemiopsis_leidyi/Info/Annotation/#assembly">https://metazoa.ensembl.org/Mnemiopsis_leidyi/Info/Annotation/#assembly</a>                                                                                                                                                                                               |
| Trichoplax adhaerens     | <a href="https://www.ncbi.nlm.nih.gov/assembly/GCF_000150275.1/#/st">https://www.ncbi.nlm.nih.gov/assembly/GCF_000150275.1/#/st</a>                                                                                                                                                                                                                         |
| Thelohanellus kitauei    | <a href="https://www.ncbi.nlm.nih.gov/data-hub/genome/GCA_000827895.1/">https://www.ncbi.nlm.nih.gov/data-hub/genome/GCA_000827895.1/</a>                                                                                                                                                                                                                   |
| Morbakka virulenta       | <a href="https://marinegenomics.oist.jp/morbakka_virulenta/download/MOR05_r06_proteins.fa.gz">https://marinegenomics.oist.jp/morbakka_virulenta/download/MOR05_r06_proteins.fa.gz</a>                                                                                                                                                                       |
| Nematostella vectensis   | <a href="https://genomes.stowers.org/files/pub/nematostella/Nvec/genomes/Nvec200/aligned/tcs_v2/tcs_v2.20211013.protein.versioned.fasta">https://genomes.stowers.org/files/pub/nematostella/Nvec/genomes/Nvec200/aligned/tcs_v2/tcs_v2.20211013.protein.versioned.fasta</a>                                                                                 |
| Acropora millepora       | <a href="https://www.ncbi.nlm.nih.gov/genome/annotation_euk/Acropora_millepora/100/">https://www.ncbi.nlm.nih.gov/genome/annotation_euk/Acropora_millepora/100/</a>                                                                                                                                                                                         |
| Rhopilema esculentum     | <a href="https://www.ncbi.nlm.nih.gov/data-hub/genome/GCA_013076305.1/">https://www.ncbi.nlm.nih.gov/data-hub/genome/GCA_013076305.1/</a>                                                                                                                                                                                                                   |
| Clytia hemisphaerica     | <a href="https://ftp.ensemblgenomes.ebi.ac.uk/pub/metazoa/release-56/fasta/clytia_hemisphaerica_gca902728285/pep/Clytia_hemisphaerica_gca902728285.GCA902728285v1.pep.all.fa.gz">https://ftp.ensemblgenomes.ebi.ac.uk/pub/metazoa/release-56/fasta/clytia_hemisphaerica_gca902728285/pep/Clytia_hemisphaerica_gca902728285.GCA902728285v1.pep.all.fa.gz</a> |
| Lottia gigantea          | <a href="https://metazoa.ensembl.org/Lottia_gigantea/Info/Annotation/">https://metazoa.ensembl.org/Lottia_gigantea/Info/Annotation/</a>                                                                                                                                                                                                                     |
| Limulus polyphemus       | <a href="https://www.ncbi.nlm.nih.gov/genome/annotation_euk/Limulus_polyphemus/101/">https://www.ncbi.nlm.nih.gov/genome/annotation_euk/Limulus_polyphemus/101/</a>                                                                                                                                                                                         |
| Branchiostoma floridae   | <a href="https://www.ncbi.nlm.nih.gov/genome/annotation_euk/Branchiostoma_floridae/100/">https://www.ncbi.nlm.nih.gov/genome/annotation_euk/Branchiostoma_floridae/100/</a>                                                                                                                                                                                 |
| Homo sapiens             | <a href="https://www.ensembl.org/Homo_sapiens/Info/Annotation">https://www.ensembl.org/Homo_sapiens/Info/Annotation</a>                                                                                                                                                                                                                                     |
| Allomyces macrogynus     | <a href="https://www.ncbi.nlm.nih.gov/data-hub/genome/GCA_000151295.1/">https://www.ncbi.nlm.nih.gov/data-hub/genome/GCA_000151295.1/</a>                                                                                                                                                                                                                   |
| Ostreococcus tauri       | <a href="https://www.ncbi.nlm.nih.gov/data-hub/genome/GCF_000214015.3/">https://www.ncbi.nlm.nih.gov/data-hub/genome/GCF_000214015.3/</a>                                                                                                                                                                                                                   |

**Supplementary Table S3 – *Clytia* P2XR gene information**

Table of the putative P2X gene locations within the *Clytia* genome.

| <b>Clytia name</b> | <b>Transcript</b> | <b>gene</b> | <b>coordinates</b>            |  |
|--------------------|-------------------|-------------|-------------------------------|--|
| ChP2X1             | TCONS_00012680    | XLOC_007123 | sc0000147:234352..239148 +    |  |
| ChP2X2             | TCONS_00058261    | XLOC_036701 | scaffold_309:662166..672147 + |  |
| ChP2X3             | TCONS_00058302    | XLOC_036723 | scaffold_309:672814..694604 - |  |
| ChP2X4             | TCONS_00058308    | XLOC_036725 | scaffold_309:695613..708230 - |  |



## Supplementary References

S1. Sievers, F. *et al.* Fast, scalable generation of high-quality protein multiple sequence alignments using Clustal Omega. *Molecular Systems Biology* **7**, 539 (2011).
